# Supplementary material for: Repetitive inductions of bioluminescence of Pseudomonas putida TVA8 immobilised by adsorption on optical fibre
Source: publisher site journal article supplement (doi:10.1515/chempap-2016-0031), 2016-01-01
Supplement: Supplementary file 1 [file chempap-2016-0031_supplement_5.docx]

**SUPPLEMENTARY DATA**

**Repetitive inductions of bioluminescence of *Pseudomonas putida* TVA8 immobilised by adsorption on optical fibre**

**aJakub Zajíc, bMilan Bittner, bTomáš Brányik, cAndrey Solovyev, cStanislav Šabata, cGabriela Kuncová[[1]](#footnote-1)*, aMarie Pospíšilová**

*aFaculty of Biomedical Engineering, Czech Technical University in Prague, 27201 Kladno 2, Czech Republic*

*bFaculty of Food and Biochemical Technology University of Chemistry and Technology Prague, Technická 5, 16001 Prague 6, Czech Republic*

*cInstitute of Chemical Process Fundamentals of the ASCR, v.v.i., Rozvojová 135, 165 02 Prague 6, Czech Republic*

Received 12 October 2015; Revised 17 December 2015; Accepted 19 December 2015

AQUATEST a.s.

AQUATEST- testing laboratories

Workplace Geologická 4, 15200 Prague 5

Head of laboratories Tel. 234607180, Fax. 234607710

Reception of samples –Tel. 234607422

Results Tel - 23467321, Fax. 234607781

Testing laboratory accredited by Czech Accreditation Institute, No 1243 according ČSN EN ISO/IEC 17025:2005

**Test Protocol No. 1097/14**


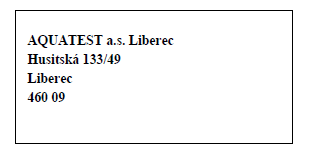
**Order party:** AQUATEST a.s. Liberec Page 1/3

**Responsible person**: Lederer

**Name of the action**: **Nanorem**

**Action No**.: 668138003018

**Locality**: Site 2

**Sampling**: Patka Mgr. (employ of Aquatest a.s.)

**Sample**: **RWA-43**

**Laboratory No.:** 3528/14

**Date of sampling**: 26.02.14

**Date of receipt**: 27.02.14

**Date of analysis:** 27.02.14 - 06.03.14

**Depth (m):** not mentioned

**Material:** groundwater

.

Results are only related to tested items. The test protocol must be reproduced complete. The parts of the protocol might be reproduced only with written permission of the laboratory.

The laboratory is liable only for results of tests of the sample in the state in which was delivered by a costumer.

| **Name of indicator** | **SOP** | **Method** | **Result** | **Unit** | **Uncert.** | **A/N** |
| --- | --- | --- | --- | --- | --- | --- |
| Amonium ions | SOP 1.8.1. | Spectroquant MERCK | 0,66 | mg/l | ±12% | A |
| Chlorides | SOP 1.1.3. | ČSN EN ISO 10304-1 | 297 | mg/l | ±8% | A |
| Nitrates | SOP 1.1.2. | ČSN EN ISO 10304-1 | <1.50 | mg/l |  | A |
| Nitrites | SOP 1.1.2. | ČSN EN ISO 10304-1 | <1.00 | mg/l |  | A |
| Fluorides | SOP 1.1.3. | ČSN EN ISO 10304-1 | <5.00 | mg/l |  | A |
| ANC 4.5 | SOP 1.13.1 | ČSN EN ISO 10304-1 | 18.3 |  | ±5% | A |
| BNC 8.3 | SOP 1.14.1 | 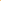ČSN 75 7372 | 1.64 |  | ±15% | A |
| pH | SOP 1.3.1 | ČSN ISO 10523 | 7.53 |  | ±0.1% | A |
| Sulphates | SOP 1.1.3 | ČSN ISO 10523 | 34.8 | mg/l | ±8% | A |
| Conductivity | SOP 1.13.1 | ČSN EN 27888 | 239 |  | ±3% | A |
| Phosphates | SOP 1.7.1 | ČSN EN ISO 6878 | 7.9 | mg/l | ±10% | A |
| CO2 aggressive | SOP 1.19.1 | ČSN 83 0520-35 (complete a sum) | 0.00 | mg/l |  | A |
| CO2 free | SOP 1.14.1 | ČSN 75 7372  ČSN 75 7373 (complete a sum) | 72.2 | mg/l | ±15% | A |
| Bicarbonates | SOP 1.13.1 | ČSN EN ISO 9963-1  ČSN 75 7373 | 1120 | mg/l | ±5% | A |
| Carbonates | SOP 1.13.1 | ČSN EN ISO 9963-1  ČSN 75 7373 | 0 |  |  | A |

Page 2/3

| **Name of indicator** | **SOP** | **Method** | **Result** | **Unit** | **Uncert./** | **A/N** |
| --- | --- | --- | --- | --- | --- | --- |
| Color |  | visually | Yellow |  |  | N |
| Sediment |  | visually | without |  |  | N |
| Smell |  | sensoric | organic |  |  | N |
| COD-Cr |  | ČSN ISO 15705, manual Hach | 390 | mg/l | ±10% | A |
| Potassium dissolved |  | ČSN EN ISO 11885 | 6.89 | mg/l | ±15% | A |
| Magnesium dissolved |  | ČSN EN ISO 11885 | 2.8 | mg/l | ±15% | A |
| Manganese dissolved |  | ČSN EN ISO 11885 | 0.500 | mg/l | ±15% | A |
| Silica oxide dissolved |  | ČSN EN ISO 11885 | 27.1 | mg/l | ±15% | A |
| Sodium dissolved |  | ČSN EN ISO 11885 | 532 | mg/l | ±15% | A |
| Calcium dissolved |  | ČSN EN ISO 11885 | 15.2 | mg/l | ±15% | A |
| Calcium and magnesium |  | complete a sum | 0.49 | mmol/l | ±20% | A |
| Iron dissolved |  | ČSN EN ISO 11885 | 7.34 | mg/l | ±15% | A |
| Benzene |  | ČSN EN ISO 10301, EPA 8015 D | 264 | μg/l | ±30% | A |
| Toluene |  | ČSN EN ISO 10301, EPA 8015 D | 172000 | μg/l | ±30% | A |
| Ethylbenzene |  | ČSN EN ISO 10301, EPA 8015 D | 7820 | μg/l | ±30% | A |
| Xylenes |  | ČSN EN ISO 10301, EPA 8015 D | 20000 | μg/l | ±30% | A |

Uncertainty is expressed as a double of standard uncertainty. Uncertainty characterized interval of values in which one can expect true value with probability 95%. This uncertainty does not include uncertainty of sampling and is not mentioned in cases of results below limits of determination.

A - Accredited method

N - No accredited method

**Information related to certain test or facts related to deviations from test specifications:**

Elemental analysis (SOP5.13.1, 5.20.1, 5.9.1) – pretreatment: In the laboratory before the determination of dissolved metals the sample was filtrated (0,45 μm) and subsequently was conserved by addition of acid (HNO3).

Responsibility of technical aspects of the protocol: J.Hůková

Staffer of exit of results

Authorization on behalf of the laboratories: Ing. Radana Mračkova Dvořakova

Director of the laboratory section

In Prague: 06.03.2014

END OF THE PROTOCOL

**TEST PROTOCOL No. 1097/14**

Page 3/3

The items written below are out of the framework of the accreditation. The values of concern were calculated and evaluated on the base on a comparison with related regulations.

| **CATIONS** | **mg/l** | **mmol/l** | **ANIONS** | **mg/l** | **mmol/l** |
| --- | --- | --- | --- | --- | --- |
| **NH4+** | 0.66 | 0.0367 | **Cl-** | 297 | 8.3773 |
| **Ca2+** | 15.2 | 0.3792 | **NO3-** | <1.50 | <0.0242 |
| **Mg2+** | 2.8 | 0.11582 | **NO2-** | <1.00 | <0.0217 |
| **K+** | 6.89 | 0.1762 | **F-** | <5.0 | <0.2632 |
| **Mn** | 0.500 | 0.0091 | **HPO42-** | 7.9 | 0.0823 |
| **Na+** | 532 | 23.1407 | **SO42-** | 34.8 | 0.3623 |
| **Fe sum** | 7.34 | 0.1314 |  |  |  |
| **SUM (mval)** | 24.62 | | **SUM (mval)** | 27.56 | |

| **CALCULATED VALUES: mmo/l mg/l** | | | |
| --- | --- | --- | --- |
| **Water hardness complete** | 0.49 | **Complete mineralization** | 2048 |
| **Calcium hardness** | 0.3792 | **CO32-** | 0 |
| **Magnesium hardness** | 0.1152 | **HCO3-** | 1116 |
| **H+** | 0.0000 | **CO2 aggress** | 0 |
| **OH-** | 0.0000 | **CO2 free** | 72.16 |
|  |  | **Langel. index** | -0.389 |

**ASSESMENT OF WATER:**

**Chemical type of water**: Na, Cl-, HCO3 **Reaction:** basic

**Hardness:** very soft

**ČSN-EN 206-1 Concrete - part 1: Specification, properties, production** nonaggressive

Remarks to English translation:

Translated: G. Kuncova

SOP = Standard operating procedure

<http://aquatest.cz.kappa.nen.cz/en/>

ANC, BNC, see - Stumm W., Morgan J. J.: *Aquatic Chemistry.,* Wiley, New York 1970 a 1996.

ČSN = Czech technical standards

1. *Corresponding author, e-mail: kuncova@icpf.cas.cz [↑](#footnote-ref-1)
